# Supplementary material
Source: PubMed Central journal article supplement (PMC6644699)

## **Supplemental Tables**

### **Excel file**

#### **Tab 01**

A list of metabolites identified in the metabolomic analysis.

#### **Tab 02**

A list of metabolites with the most significant alterations between BPH1 and PC-3 cells.

#### **Tab 03**

Data used to generate the volcano plot for the comparison of BPH1 and PC-3 cells.

[IS] d4-succinate [10.462]  
[011] Pyruvic acid [6.707]  
[012] L-Lactic acid [6.845]  
[051] L-Alanine 1 [7.471]  
[052] L-Valine 2 [9.154]  
[200] Phosphate [9.9]  
[053] L-Leucine 2 [9.951]  
[190] Glycerol [9.947]  
[054] L-Isoleucine 2 [10.232]  
[76] L-threonine 1 [10.231]  
[050] Glycine [10.464]  
[017] Succinic acid [10.517]  
[018] Fumaric acid [10.949]  
[059] L-Serine 2 [11.184]  
[060] L-Threonine 2 [11.475]  
[210] Thymine [11.611]  
[074] Beta-Alanine 1 [12.058]  
[78] Iminodiacetic acid 1 [12.502]  
[217] 1-methyl nicotinamide 1 [12.752]  
[019] D-Malic acid [12.810]  
[118] D-threitol [12.971]  
[x] salicylic acid [13.061]  
[062] L-Methionine 2 [13.206]  
[065] L-Aspartic acid 2 [13.225]  
[070] Pyroglutamic acid [13.236]  
[056] L-Phenylalanine 1 [13.564]  
[221] Creatinine [13.649]  
[252] 2-Hydroxyglutaric acid  
[301] Hypotaurine [14.134]  
[066] L-Glutamic acid 2 [14.421]  
[x] ribonic acid-gamma-lactone 1 [15.077]  
[x] 1,6-anhydro-glucose [15.352]  
[191] glycerol 3-phosphate [16.085]  
[194] O-Phosphoethanolamine [16.261]  
[008] 3-Phosphoglyceric acid [16.525]  
[206] Hypoxanthine 1 [16.472]  
[013] Citric acid [16.646]  
[015] Isocitric acid [16.614]  
[110] alpha-D-glucosamine 1-phosphate [16.662]  
[158] Myristic acid [16.919]  
[x] methyl-beta-D-galactopyranoside [16.967]  
[209] Adenine [17.106]  
[100] D-Fructose 1 [17.213]  
[x] gluconic acid lactone 1 [17.337]  
[057] L-Tyrosine 1 [17.379]  
[111] D-Galactosamine 3 [17.557]  
[001] D-glucose 2 [17.660]  
[223] L-Ascorbic acid [17.975]

### **Krebs cycle metabolites (8)**

[IS] d4-succinate [10.462]  
[011] Pyruvic acid [6.707]  
[012] L-Lactic acid [6.845]  
[013] Citric acid [16.646]  
[015] Isocitric acid [16.614]  
[017] Succinic acid [10.517]  
[018] Fumaric acid [10.949]  
[019] D-Malic acid [12.810]

### **Nucleotides (7)**

[206] Hypoxanthine 1 [16.472]  
[207] Adenosine [23.883]  
[208] Inosine [23.453]  
[209] Adenine [17.106]  
[210] Thymine [11.611]  
[212] Adenosine monophosphate 1 [26.907]  
[217] 1-methyl nicotinamide 1 [12.752]

[332] Kynurenic acid [19.159]  
[107] Myoinositol [19.395]  
[058] L-Tryptophan 2 [20.512]  
[109] Inositol phosphate  
[208] Inosine [23.453]  
[207] Adenosine [23.883]  
[113] Cellobiose 2 [24.762]  
[x] turanose 1 [24.872]  
[179] Glycerol 1-octadecanoate [24.975]  
[212] Adenosine monophosphate 1 [26.907]  
[180] Cholesterol [27.629]

### **carbohydrates (8)**

[001] D-glucose 2 [17.660]  
[008] 3-Phosphoglyceric acid [16.525]  
[100] D-Fructose 1 [17.213]  
[107] Myoinositol [19.395]  
[109] Inositol phosphate  
[111] D-Galactosamine 3 [17.557]  
[113] Cellobiose 2 [24.762]  
[118] D-threitol [12.971]

### **Lipids (6)**

[158] Myristic acid [16.919]  
[179] Glycerol 1-octadecanoate [24.975]  
[180] Cholesterol [27.629]  
[190] Glycerol [9.947]  
[191] glycerol 3-phosphate [16.085]  
[194] O-Phosphoethanolamine [16.261]

### **amino acids (17)**

[050] Glycine [10.464]  
[051] L-Alanine 1 [7.471]  
[052] L-Valine 2 [9.154]  
[053] L-Leucine 2 [9.951]  
[054] L-Isoleucine 2 [10.232]  
[056] L-Phenylalanine 1 [13.564]  
[057] L-Tyrosine 1 [17.379]  
[058] L-Tryptophan 2 [20.512]  
[059] L-Serine 2 [11.184]  
[060] L-Threonine 2 [11.475]  
[062] L-Methionine 2 [13.206]  
[065] L-Aspartic acid 2 [13.225]  
[066] L-Glutamic acid 2 [14.421]  
[070] Pyroglutamic acid [13.236]  
[074] Beta-Alanine 1 [12.058]  
[76] L-threonine 1 [10.231]  
[78] Iminodiacetic acid 1 [12.502]

### **Other intermediates 7)**

- [x] ribonic acid-gamma-lactone 1 [15.077]
- [x] salicylic acid [13.061]
- [x] ribonic acid-gamma-lactone 1 [15.077]
- [x] 1,6-anhydro-glucose [15.352]
- [x] methyl-beta-D-galactopyranoside [16.967]
- [x] gluconic acid lactone 1 [17.337]
- [x] turanose 1 [24.872]

### **end metabolites (6)**

- [200] Phosphate [9.9]
- [221] Creatinine [13.649]
- [223] L-Ascorbic acid [17.975]
- [252] 2-Hydroxyglutaric acid
- [301] Hypotaurine [14.134]
- [332] Kynurenic acid [19.159]

Table S2

|                                 | Fold Change | log2(FC) |
|---------------------------------|-------------|----------|
| D-Galactosamine                 | 438.5       | 8.7764   |
| D-glucose                       | 149.44      | 7.2235   |
| Adenosine monophosphate         | 0.088545    | -3.4975  |
| D-Malic acid                    | 0.10336     | -3.2742  |
| Fumaric acid                    | 0.10716     | -3.2221  |
| Beta-Alanine                    | 0.13389     | -2.9009  |
| D-Fructose                      | 6.6127      | 2.7252   |
| ribonic acid-gamma-lactone      | 6.2682      | 2.6481   |
| methyl-beta-D-galactopyranoside | 5.33        | 2.4141   |
| gluconic acid lactone           | 5.2338      | 2.3879   |
| Cellobiose                      | 4.6205      | 2.2081   |
| 1-methyl nicotinamide           | 0.22209     | -2.1708  |
| turanose                        | 4.3849      | 2.1326   |
| Kynurenic acid                  | 4.2991      | 2.104    |
| Succinic acid                   | 0.25405     | -1.9768  |
| Creatinine                      | 0.2759      | -1.8578  |
| Hypotaurine                     | 0.32995     | -1.5997  |
| O-Phosphoethanolamine           | 0.38355     | -1.3825  |
| alpha-D-glucosamine 1-phosphate | 2.4068      | 1.2671   |
| Citric acid                     | 0.43496     | -1.201   |
| 3-Phosphoglyceric acid          | 2.2665      | 1.1805   |
| L-Tryptophan                    | 2.2422      | 1.1649   |
| L-Lactic acid                   | 0.46798     | -1.0955  |
| L-Aspartic acid                 | 0.48145     | -1.0545  |
| Adenosine                       | 0.49508     | -1.0143  |

Table S3

|                                 | FC       | log2(FC) | raw.p val | log10 P |
|---------------------------------|----------|----------|-----------|---------|
| D-Malic acid                    | 0.10336  | -3.2742  | 4.27E-07  | 6.3698  |
| Beta-Alanine                    | 0.13389  | -2.9009  | 2.45E-06  | 5.6103  |
| Succinic acid                   | 0.25405  | -1.9768  | 4.70E-05  | 4.3278  |
| L-Lactic acid                   | 0.46798  | -1.0955  | 9.58E-05  | 4.0186  |
| 1-methyl nicotinamide           | 0.22209  | -2.1708  | 0.000125  | 3.9032  |
| D-Galactosamine                 | 438.5    | 8.7764   | 0.0002437 | 3.6132  |
| Hypotaurine                     | 0.32995  | -1.5997  | 0.0005332 | 3.2731  |
| Fumaric acid                    | 0.10716  | -3.2221  | 0.0009867 | 3.0058  |
| alpha-D-glucosamine 1-phosphate | 2.4068   | 1.2671   | 0.0010258 | 2.9889  |
| D-glucose                       | 149.44   | 7.2235   | 0.0011545 | 2.9376  |
| Citric acid                     | 0.43496  | -1.201   | 0.0011825 | 2.9272  |
| ribonic acid-gamma-lactone      | 6.2682   | 2.6481   | 0.0015986 | 2.7963  |
| Creatinine                      | 0.2759   | -1.8578  | 0.0016823 | 2.7741  |
| 3-Phosphoglyceric acid          | 2.2665   | 1.1805   | 0.0029565 | 2.5292  |
| L-Tryptophan                    | 2.2422   | 1.1649   | 0.0029842 | 2.5252  |
| Adenosine monophosphate         | 0.088545 | -3.4975  | 0.0031227 | 2.5055  |
| O-Phosphoethanolamine           | 0.38355  | -1.3825  | 0.0051117 | 2.2914  |
| D-Fructose                      | 6.6127   | 2.7252   | 0.010059  | 1.9975  |
| Cellobiose                      | 4.6205   | 2.2081   | 0.018885  | 1.7239  |
| Kynurenic acid                  | 4.2991   | 2.104    | 0.019147  | 1.7179  |
| L-Aspartic acid                 | 0.48145  | -1.0545  | 0.019465  | 1.7107  |
| turanose                        | 4.3849   | 2.1326   | 0.049755  | 1.3032  |
| gluconic acid lactone           | 5.2338   | 2.3879   | 0.066873  | 1.1747  |

Li, et al. supplemental Fig 1

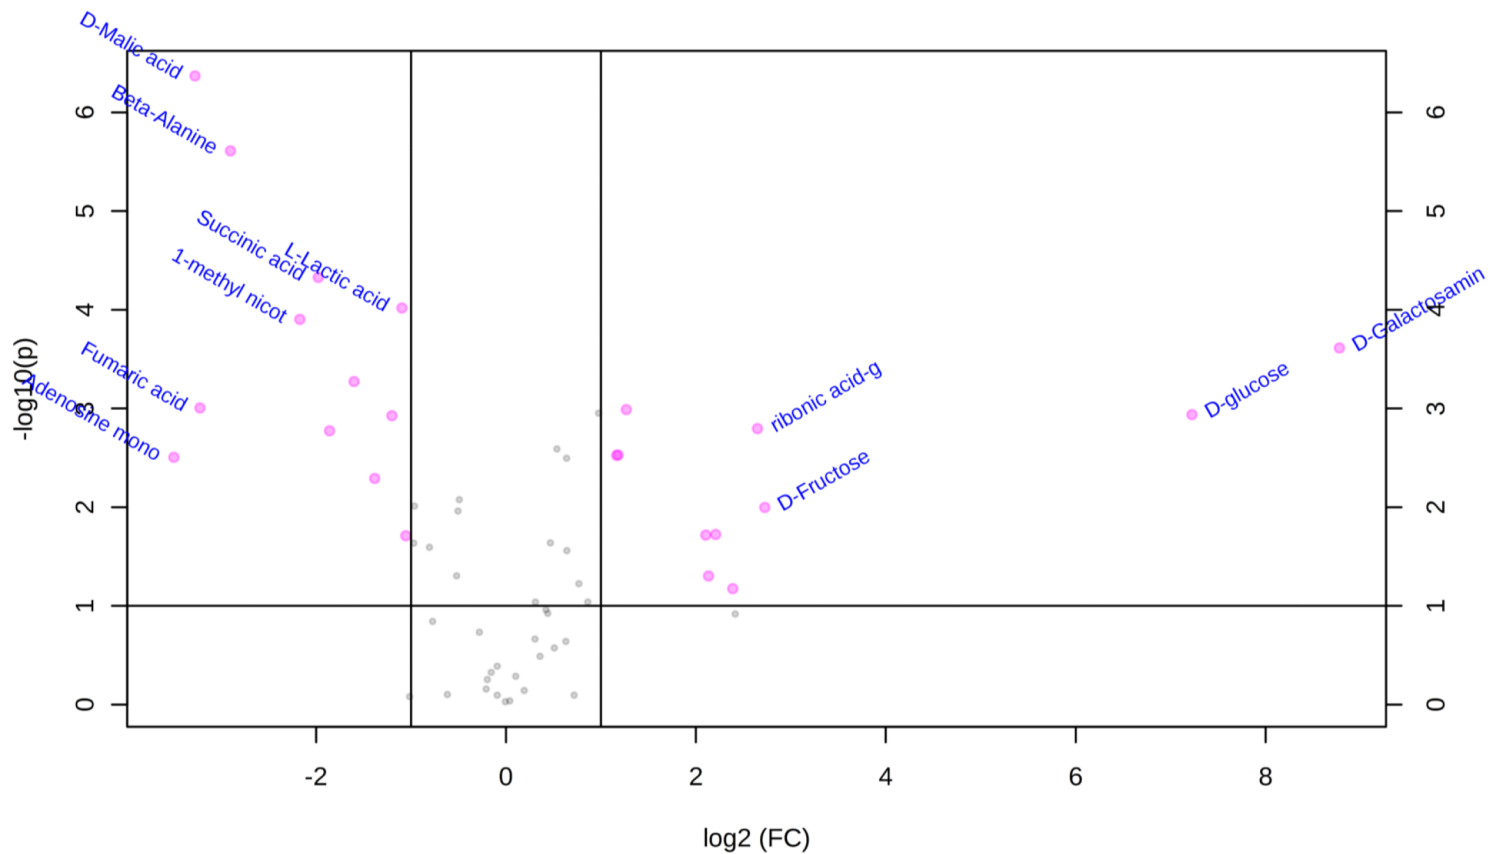

Li, et al. supplemental Fig 2

PC-3

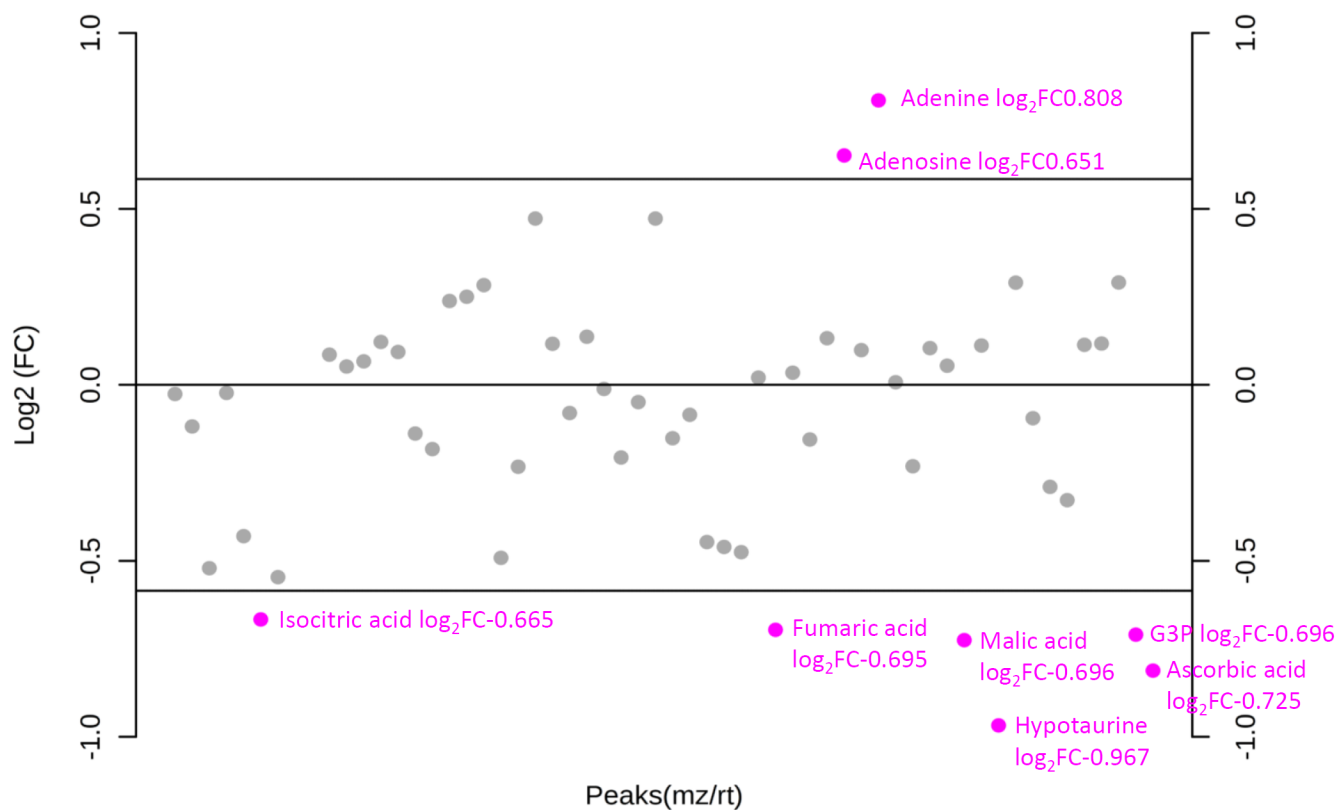



Li, et al. supplemental Fig 3

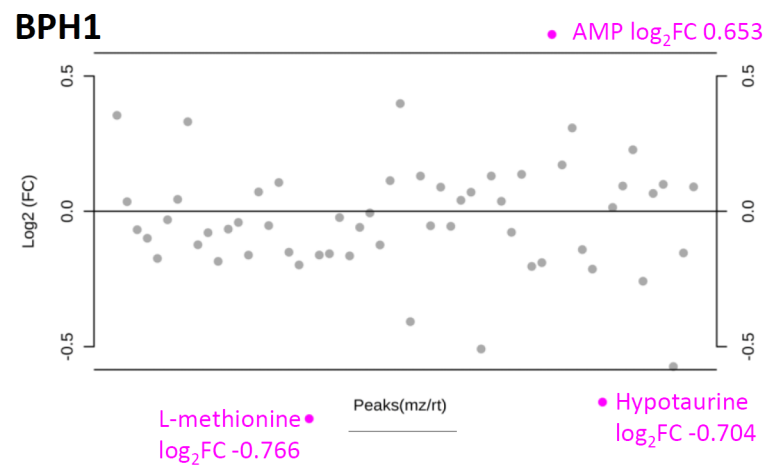

Supplement: NIHMS1035933-supplement-Supplement.pdf [file NIHMS1035933-supplement-Supplement.pdf]
